# Supplementary material
Source: PubMed Central journal article supplement (PMC5006708)
Supplement: supp_tpc.16.00310_TPC2016-00310-LSBR1_Supplemental_Data.pdf [file supp_tpc.16.00310_TPC2016-00310-LSBR1_Supplemental_Data.pdf]

A Host: maize

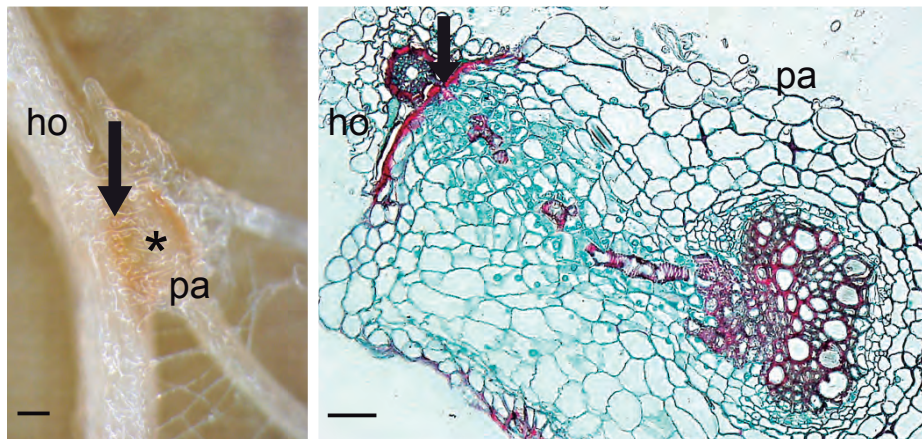

B Host: cowpea

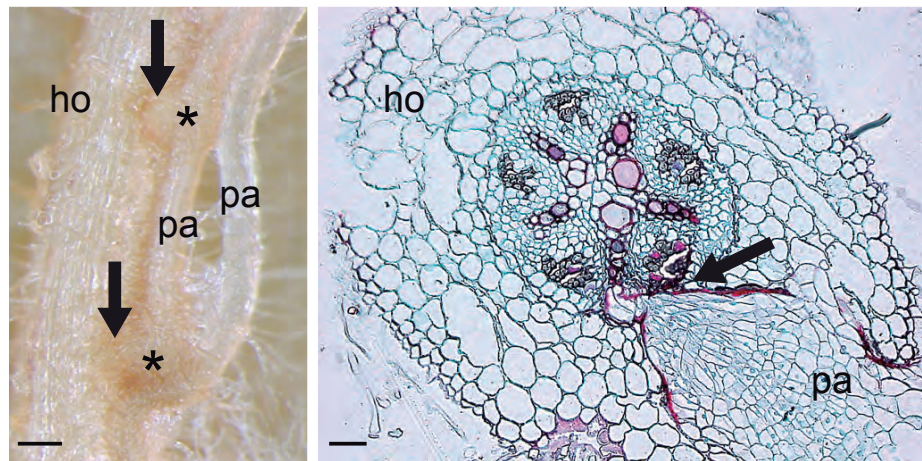

C Host: *Lotus japonicus*

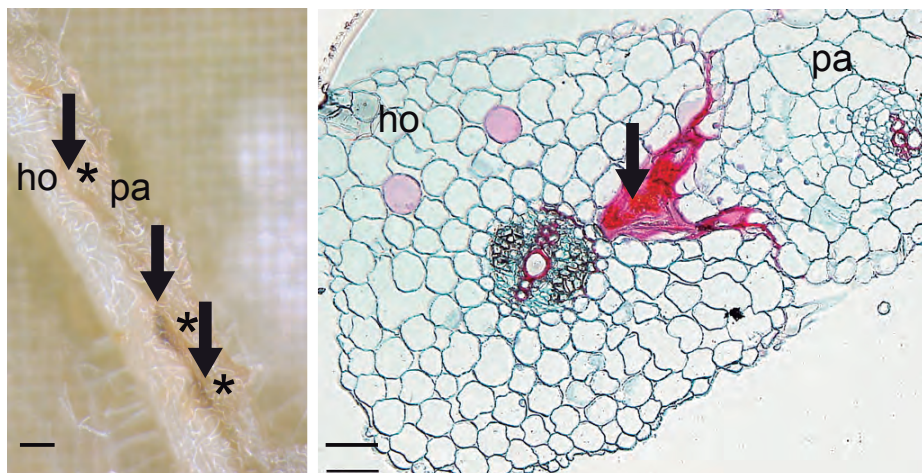

Supplemental Figure 1. Host specificity of the parasitic plant *P. japonicum*. (A - C) Interaction of *P. japonicum* with maize (A), cowpea (B) and *Lotus japonicus* (C) roots. On the right are shown the respective double-stained cross sections of haustoria embedded with Tecnovit 7100 solution stained with Safranin O and Fast Green dyes. Note that *L. japonicus* is a nonhost for *P. japonicum*. Black arrows point to the interface between the host and parasite. Asterisks mark the haustoria, pa: parasite root and ho: putative host root. Bars on the left photographs correspond to 200  $\mu\text{m}$  and bars on the right cross sections correspond to 50  $\mu\text{m}$ .

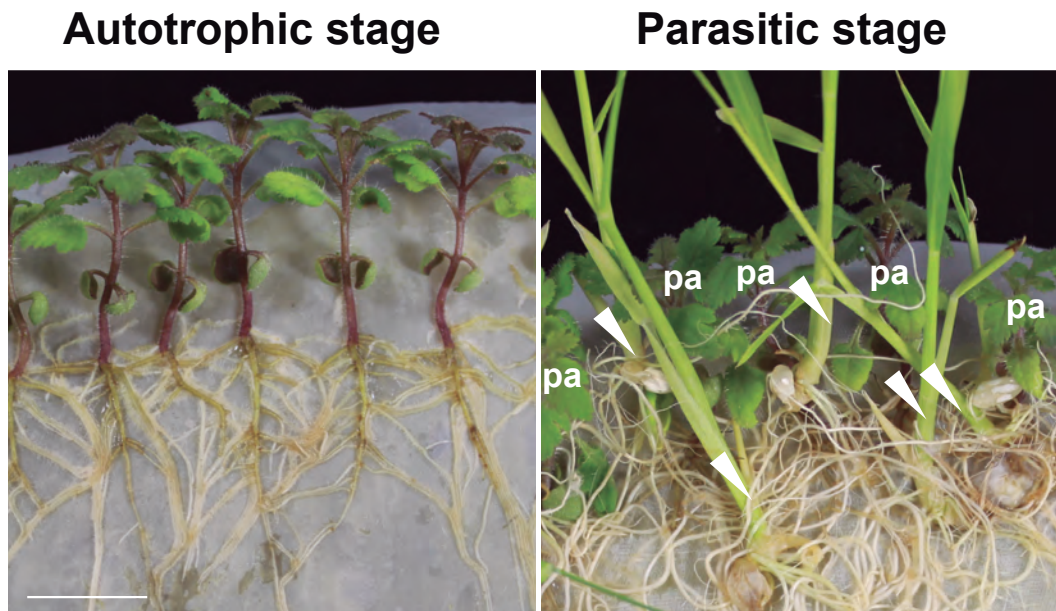

Supplemental Figure 2. *P. japonicum* grown in rhizotron with or without rice hosts. *P. japonicum* plants were grown in rhizotron chamber without (left) or with (right) rice hosts. Parasites are labeled with pa and hosts are labeled with white arrowheads in the right panel. Bar: 1 cm.

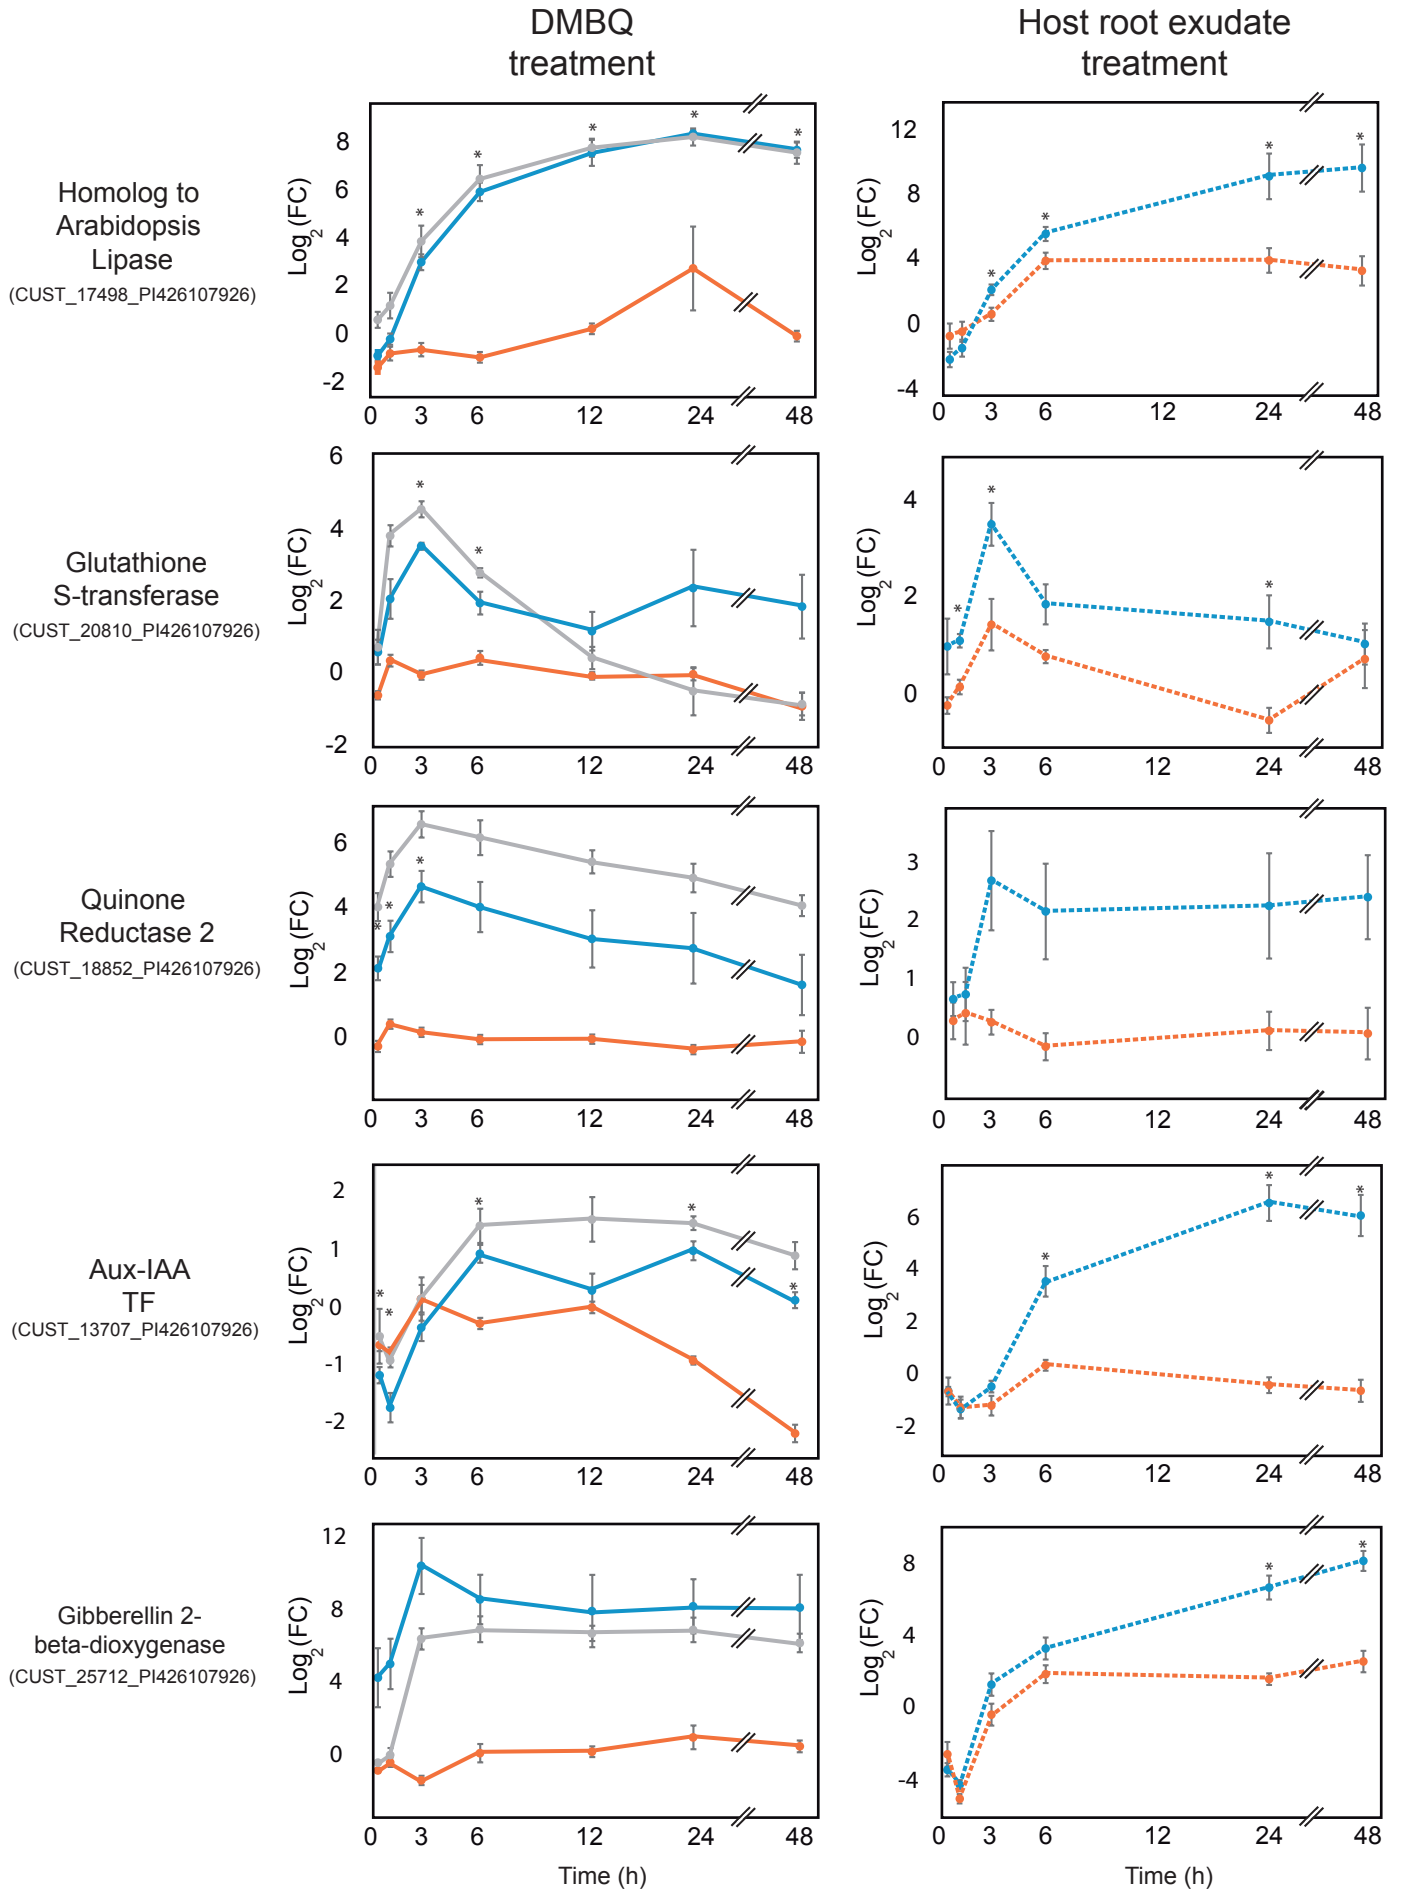



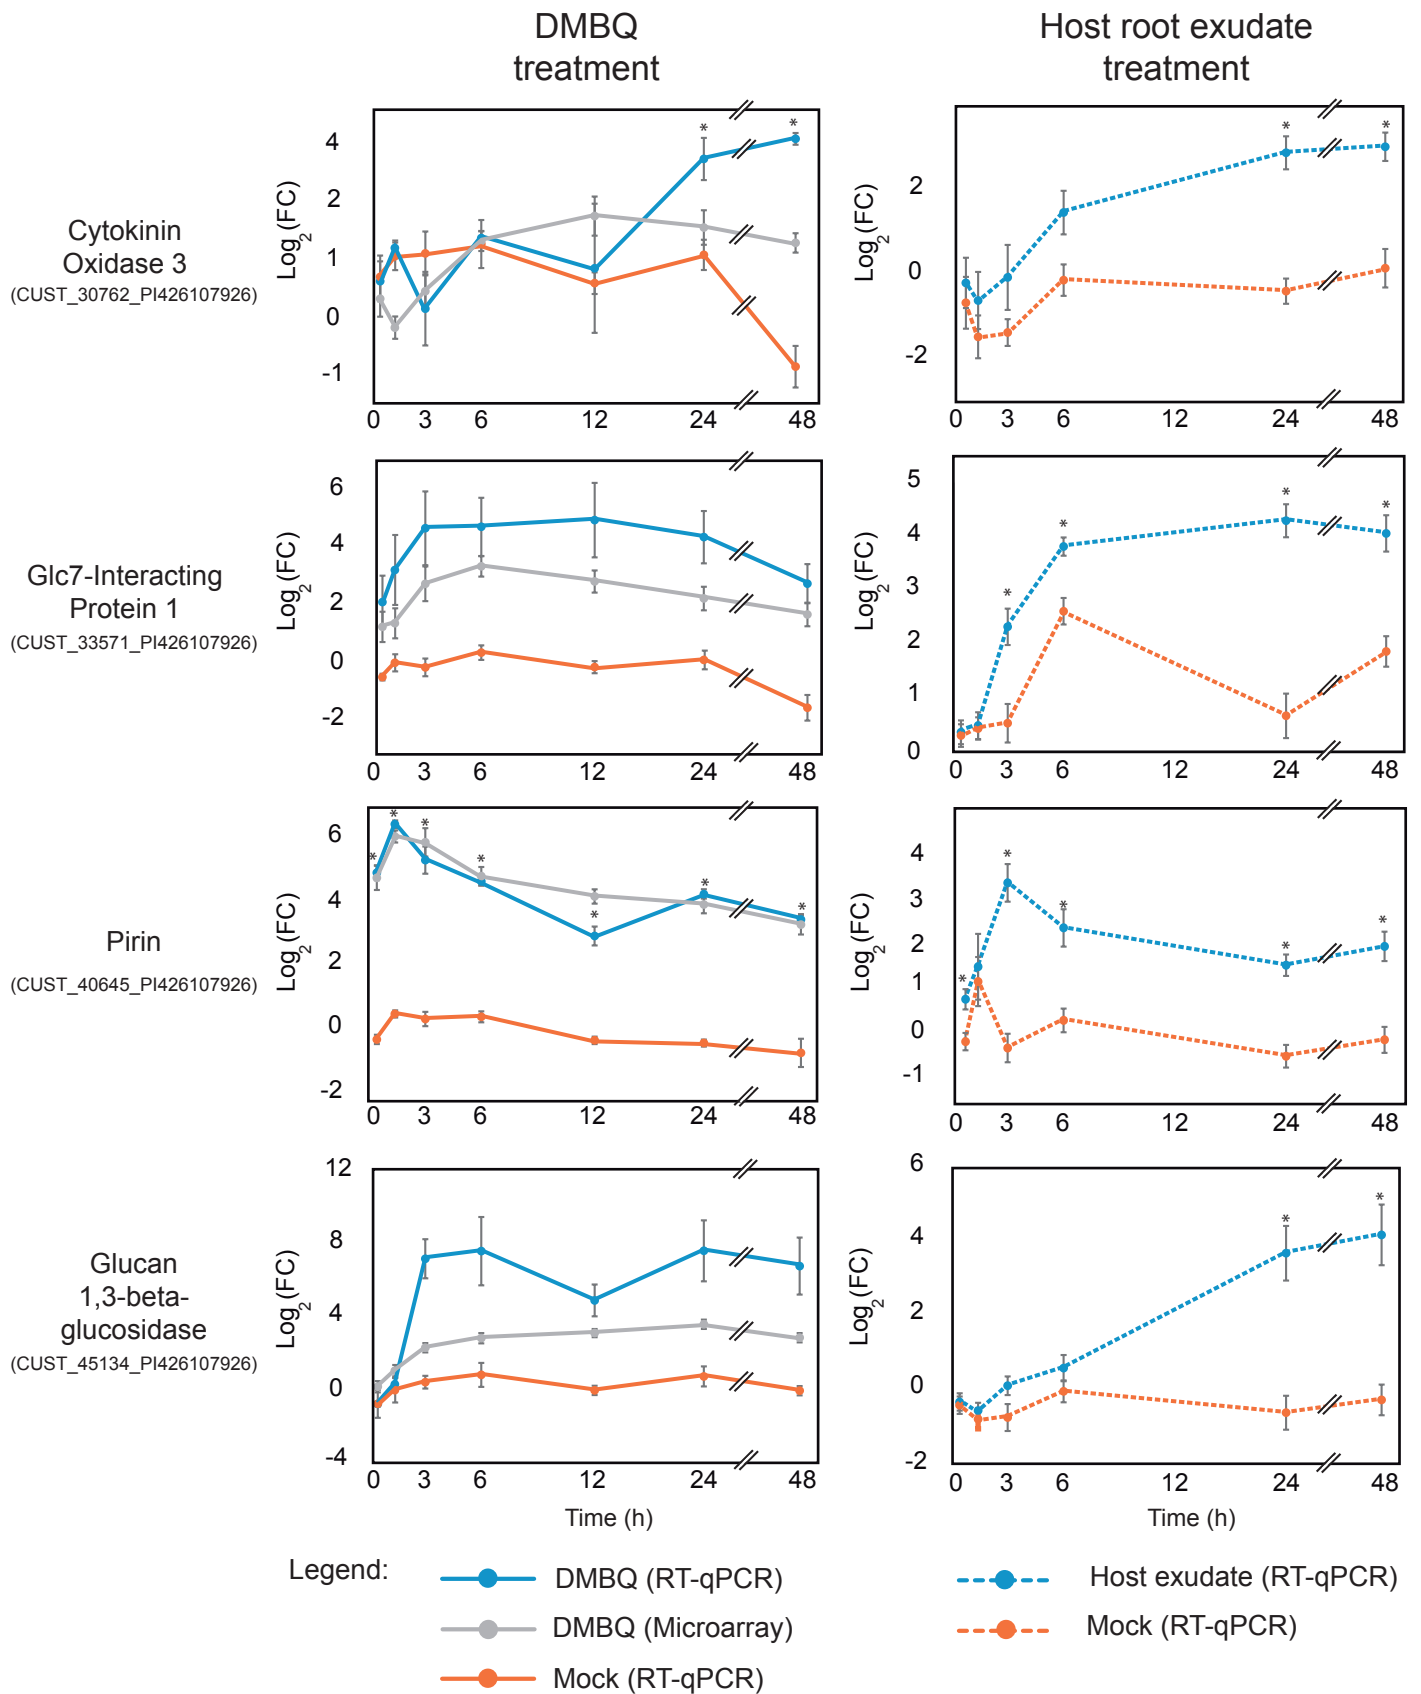

Supplemental Figure 3. RT-qPCR validation of the expression profiles of selected genes. Fold-induction of gene expression after DMBQ (solid orange lines) or mock (solid blue lines on the left column) treatment. For comparison, microarray data are shown in the graphs of DMBQ-treated roots (solid gray lines). Host rice root exudate (dashed orange lines) or mock (dashed blue lines) treatments. Data are shown as log<sub>2</sub> fold-induction of treated roots compared to non-treated roots at 30 min, 1 h, 3 h, 6 h, 24 h and 48 h of treatment period. Two-week-old *P. japonicum* plants were grown vertically to prevent the roots from entering the agar media, thereby forcing the roots to be in contact with 10  $\mu$ M DMBQ solution (on the left) or with rice root exudate (on the right). The values are the average of at least two biological replicates with at least two technical replicates. Error bars indicate  $\pm$  standard errors (SE). Each experiment used pooled RNA extracted from the roots of total 20-30 plants. Asterisks indicate significant differences (p value<0.05) compared to mock-treatment in RT-qPCR experiments. Primers specific for the reference *Pj-PTB* gene were used for normalization.

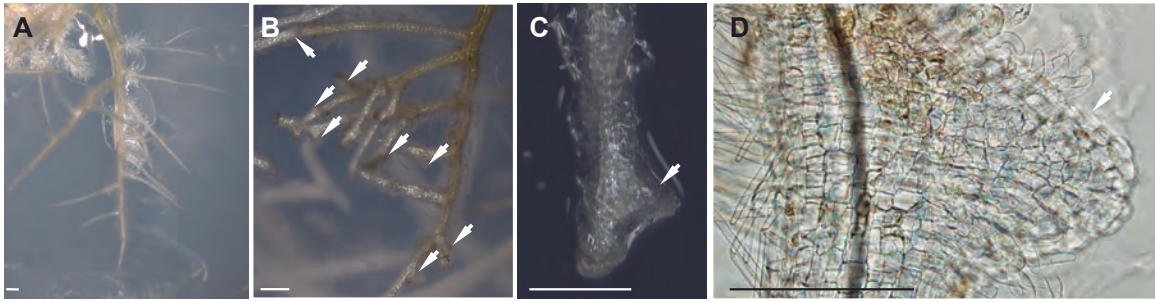

Supplemental Figure 4. *P. japonicum* roots at 48 h after rice root exudate treatment. (A) Non-transformed roots in normal growth conditions and (B) non-transformed roots treated 48 h with rice root exudate. (C-D) Magnification of host-induced haustoria in non-transformed roots. Root tissues were cleared with chloral hydrate and observed under bright-field microscope (D). The black bar corresponds to 500  $\mu\text{m}$  and white bars correspond 250  $\mu\text{m}$ . White arrows indicate haustoria.

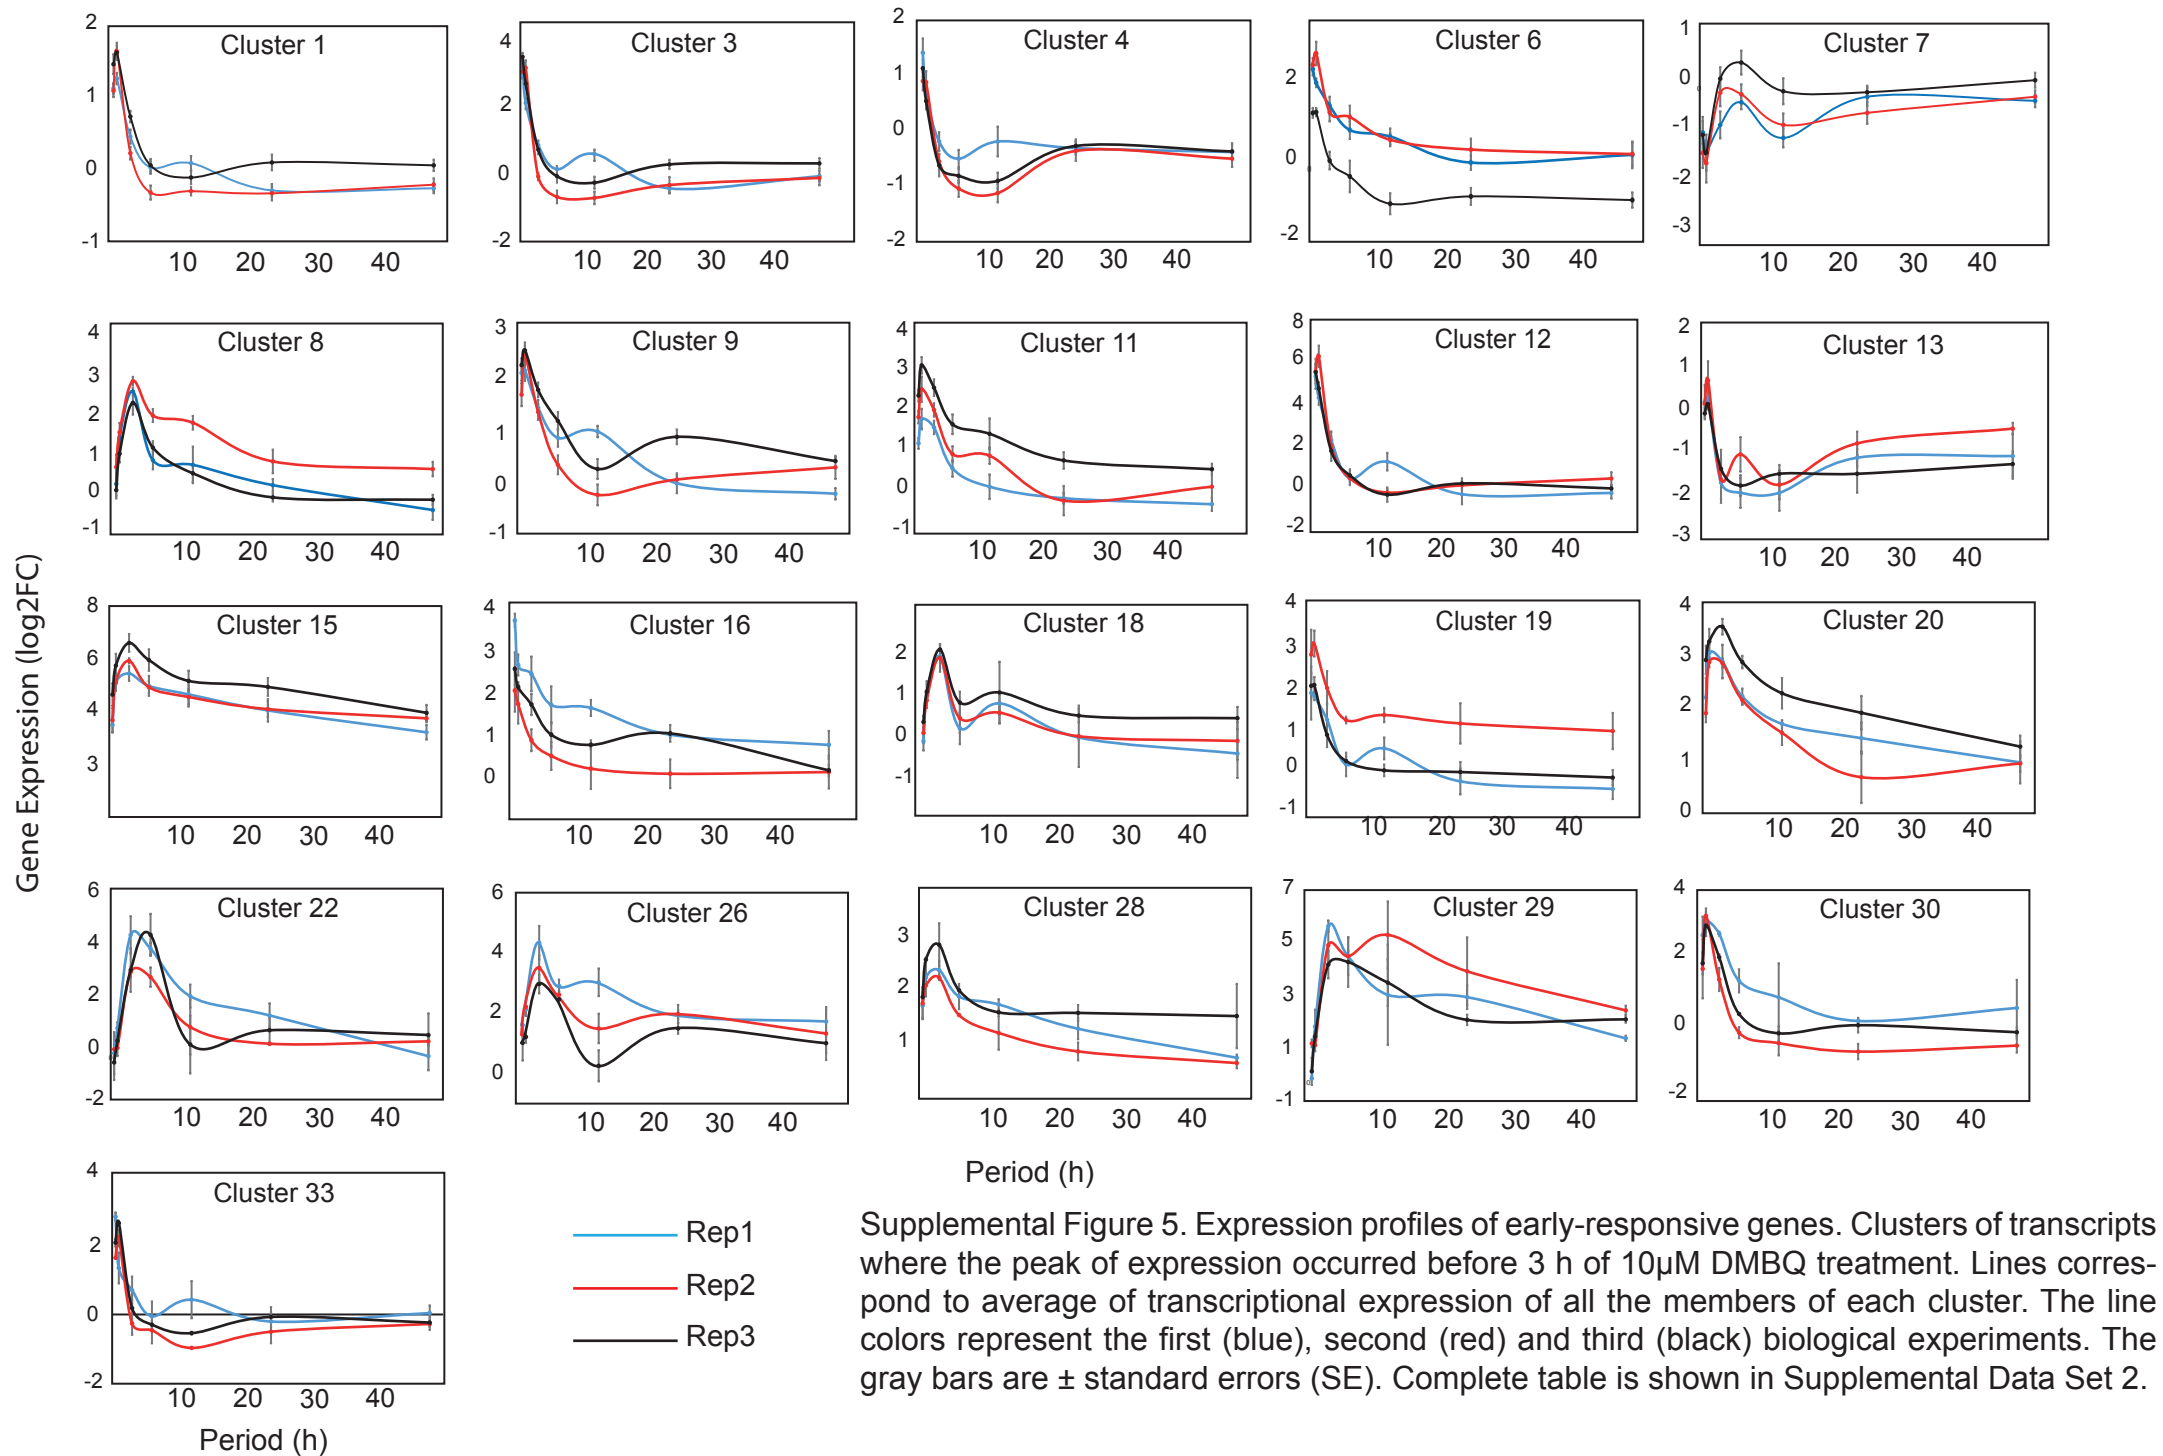

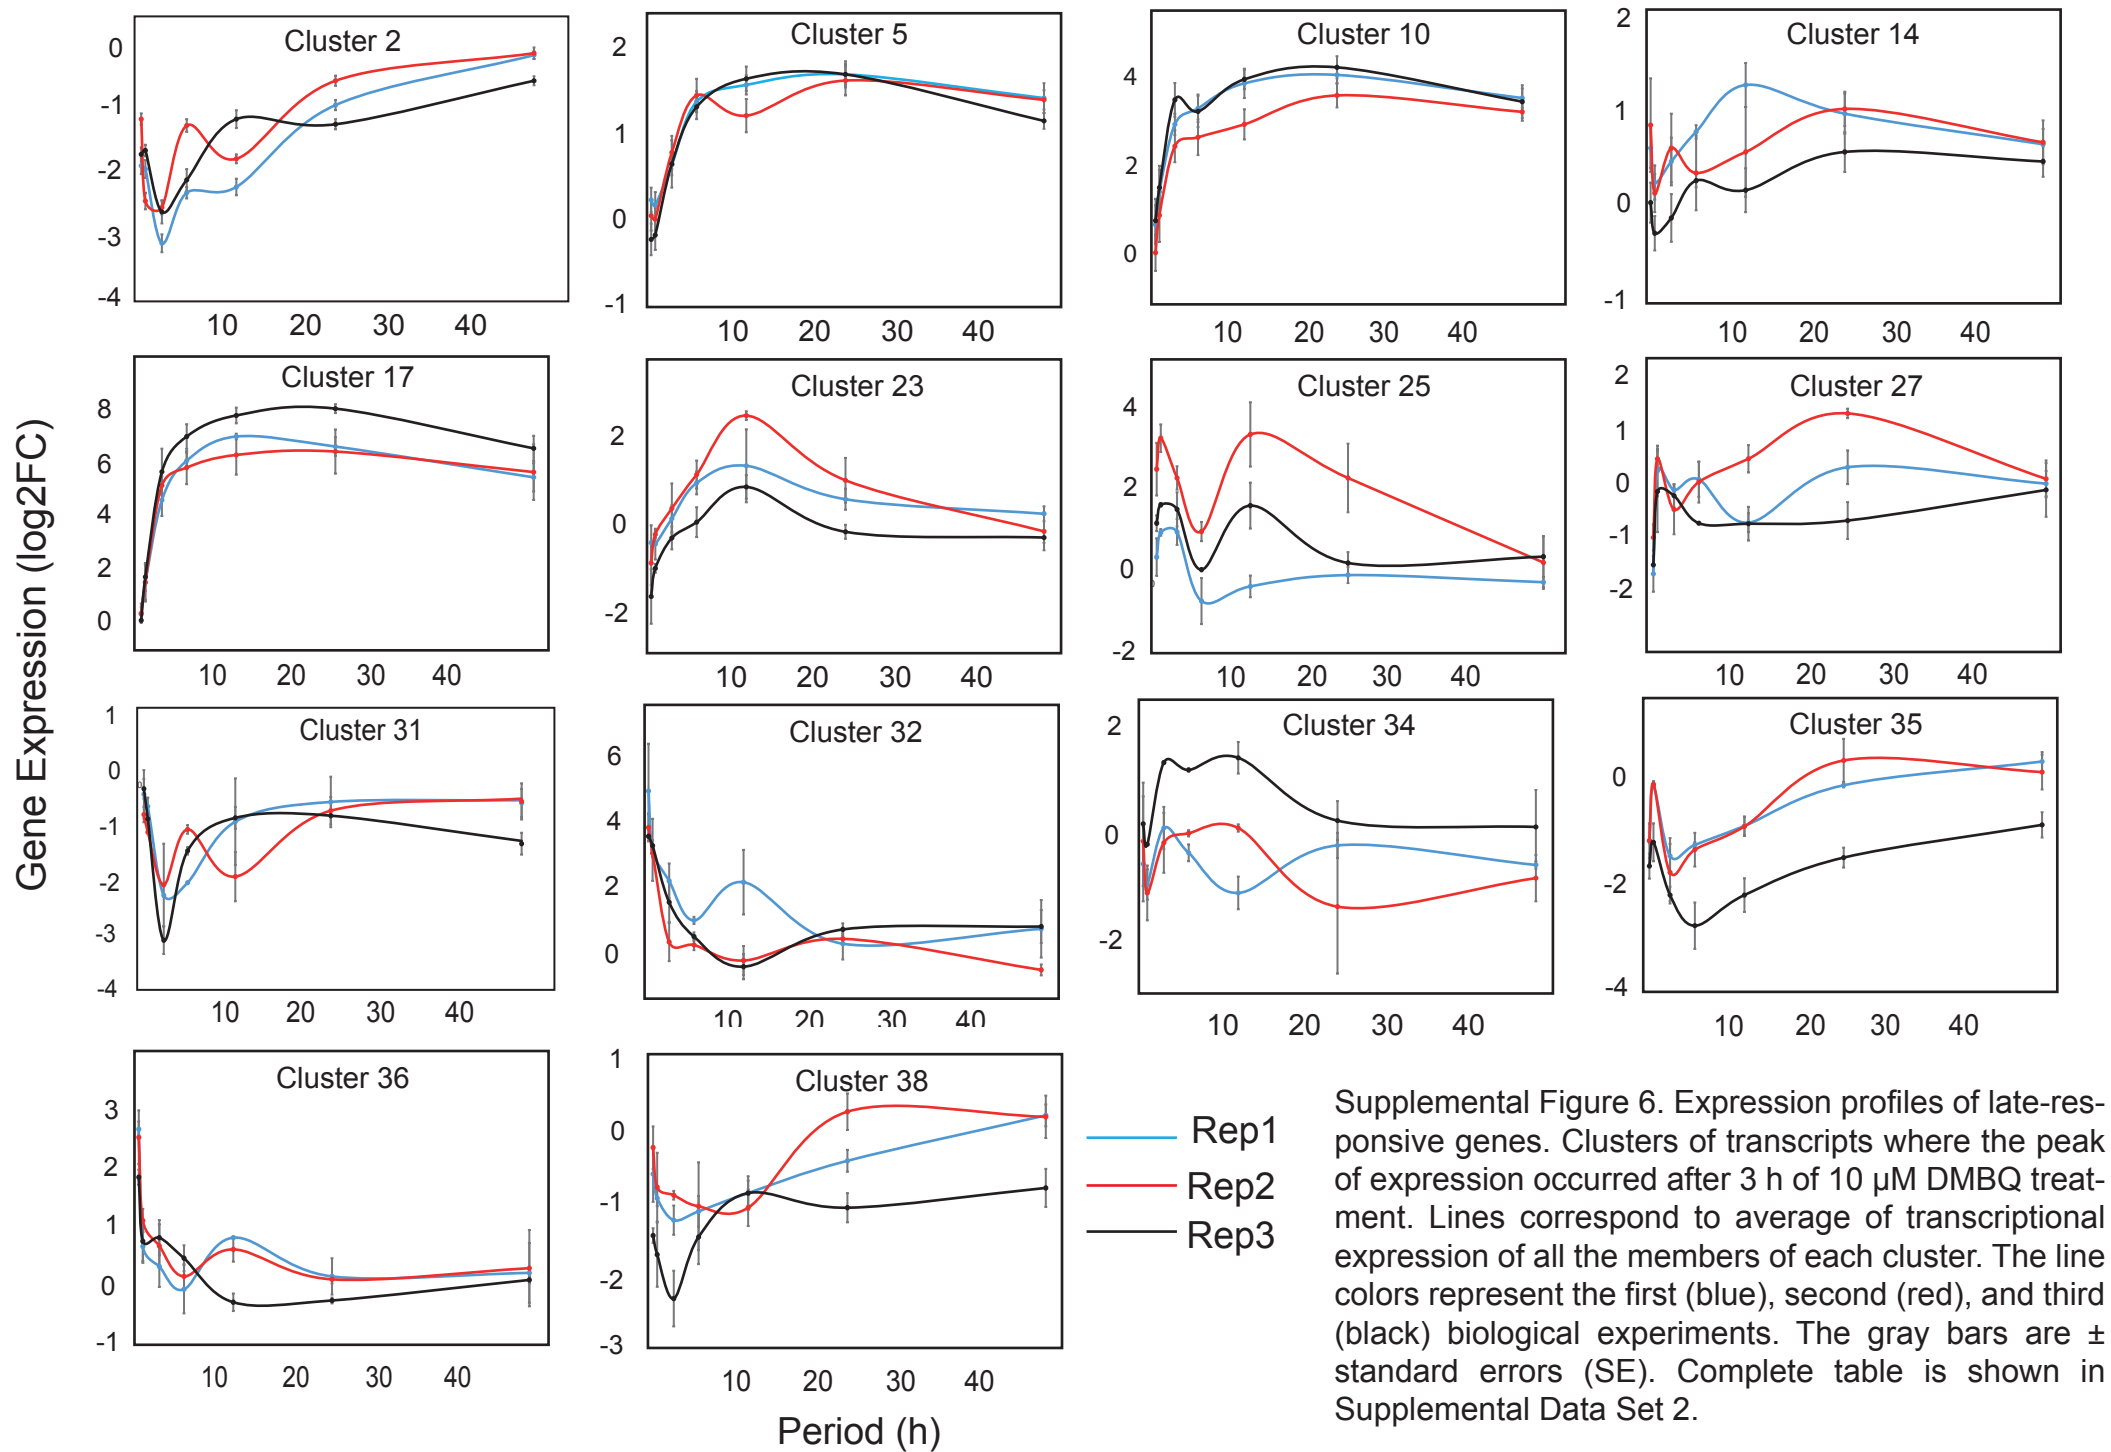



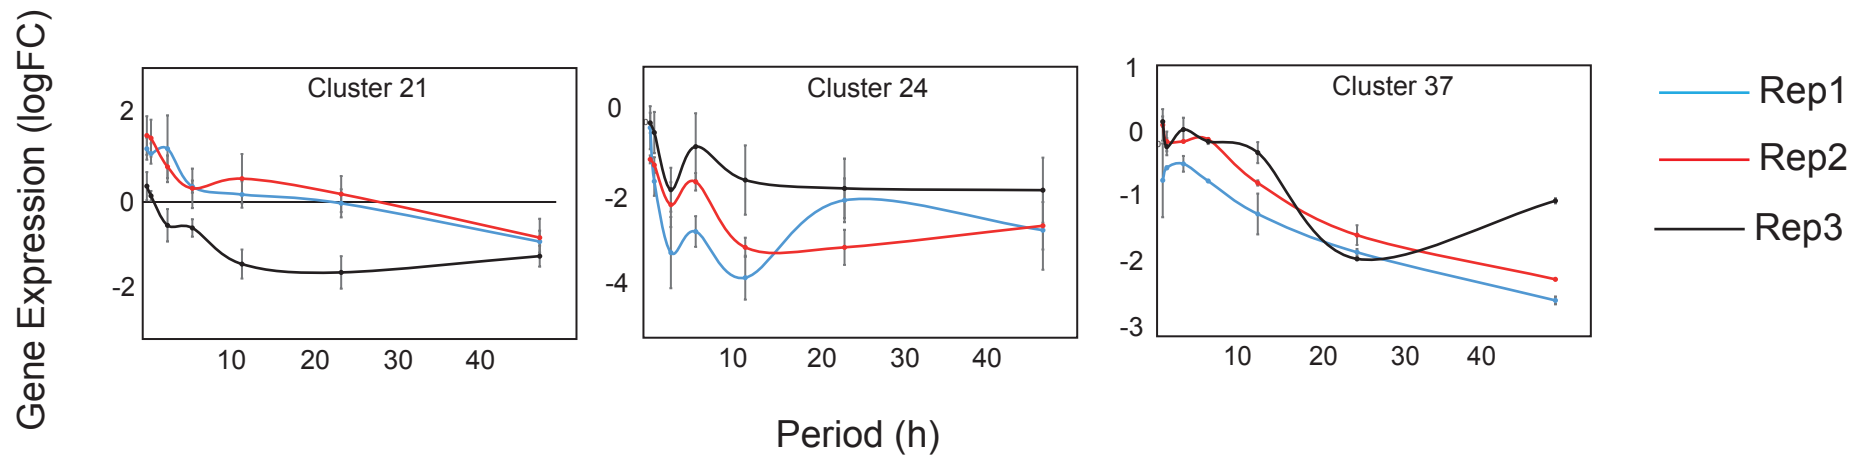

Supplemental Figure 7. Expression profiles of down-regulated genes. Lines correspond to average of transcriptional expression of all the members of each cluster. The line colors represent the first (blue), second (red), and third (black) biological experiments. The gray bars are  $\pm$  standard errors (SE). Complete table is shown in Supplemental Data Set 2.

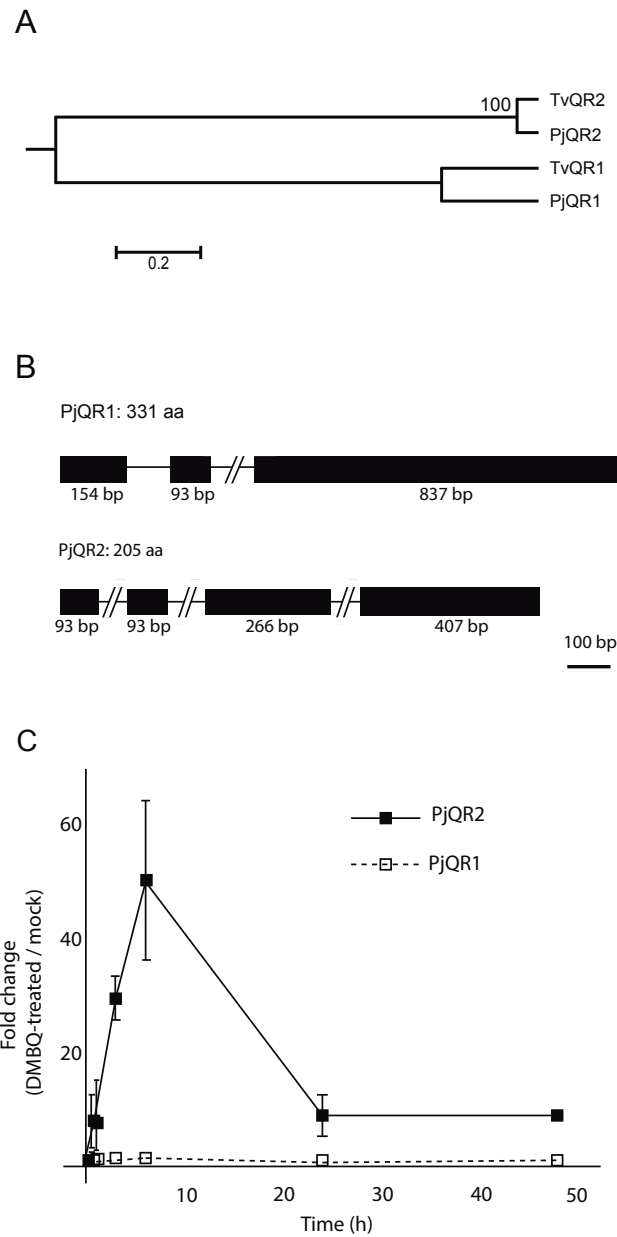

Supplemental Figure 8. *QR2* rather than *QR1* is differentially regulated during parasitism. (A) The UPGMA phylogenetic tree based on full-length protein alignment of Pj-QR1, Pj-QR2 and their homologs in *T. vesicolor*, Tv-QR1 and Tv-QR2. Bootstrap values are shown in percentage at the internal nodes. (B) Schematic view of the *Pj-QR1* and *Pj-QR2* genes, black boxes represent exons and lines are introns. The bar corresponds to 100 bp. (C) Relative expression levels of *QR1* and *QR2* measured by RT-qPCR. Values correspond to the ratio between the expression of 10  $\mu$ M DMBQ-treated roots compared to mock-treated roots (0.1% (v/v) DMSO) sampled at 0.5 h, 1 h, 3 h, 6 h, 24 h and 48 h after treatment. Data represent the average  $\pm$  standard errors (SE) of three independent biological replicates.

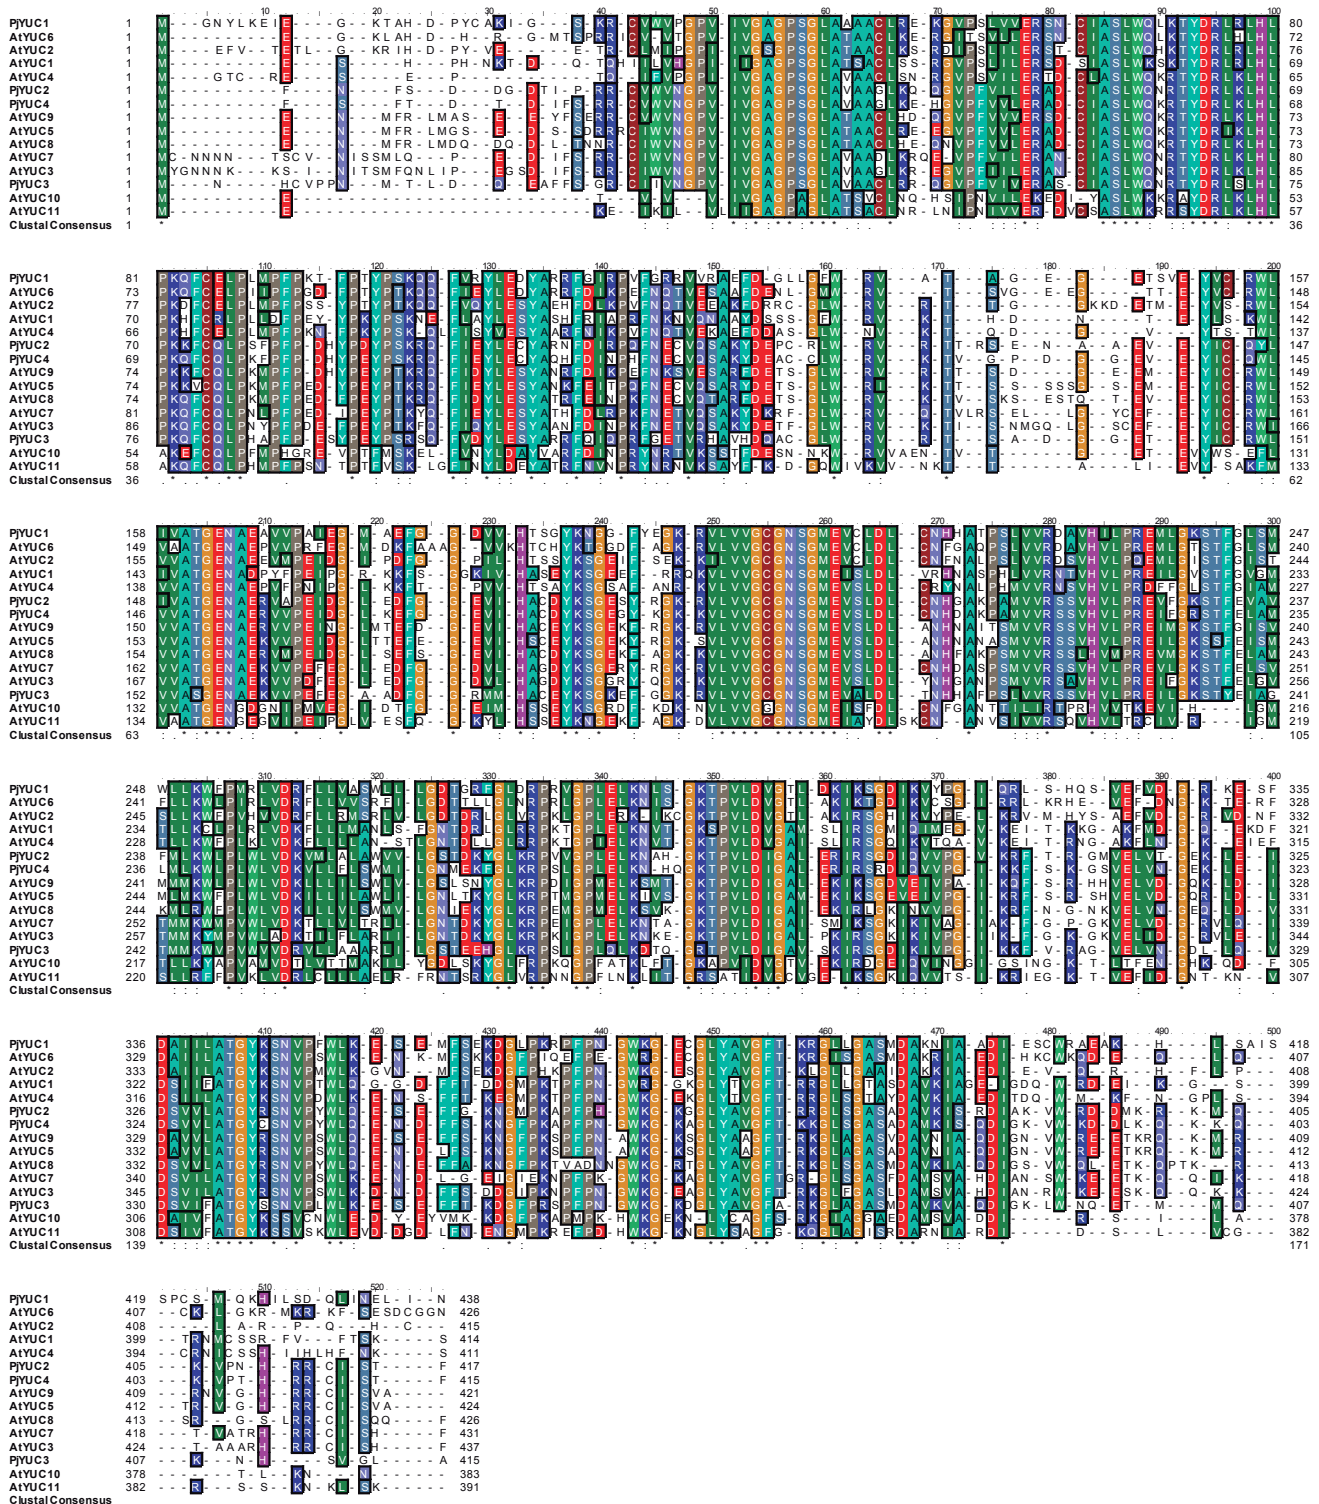

Supplemental Figure 9. Alignment of Pj-YUCs and At-YUCs amino acid sequences. The sequences were aligned using CLC Genomics Workbench (v4.8) and the figure was generated by BioEdit. Residues are background-shaded according to their identity or similarity scores calculated from protein similarity matrix BLOSUM62 with the default cut-off value in BioEdit software. Amino acids with similar property are shaded with the same color.

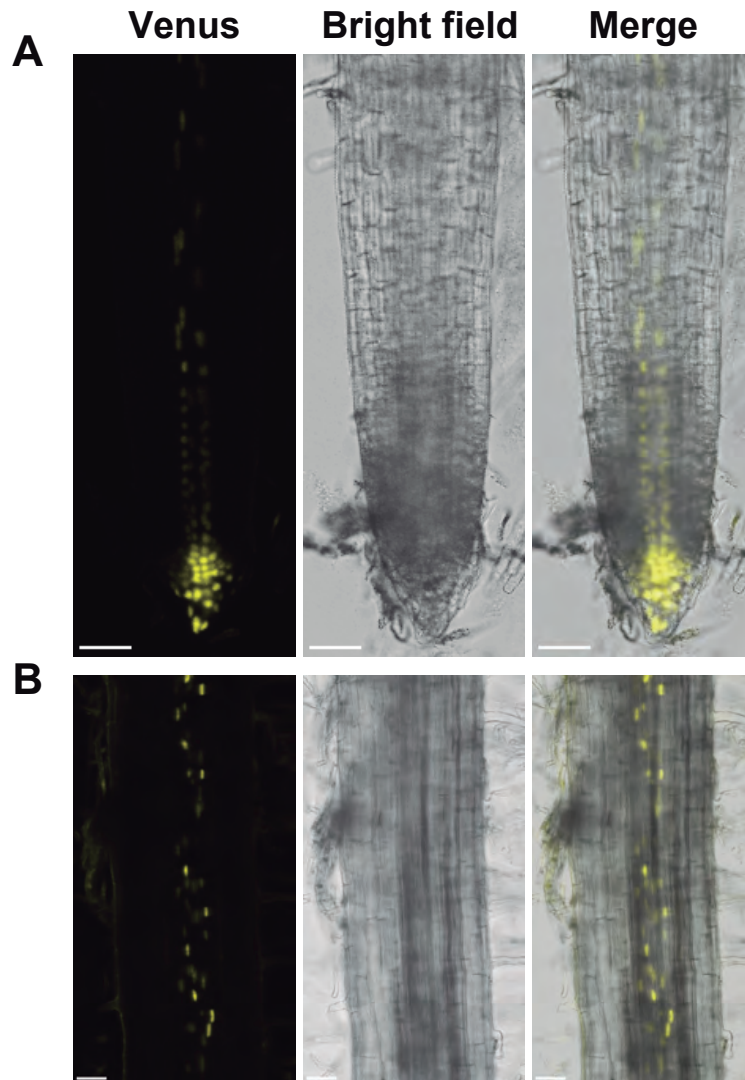

Supplemental Figure 10. Expression pattern of DR5 promoter in *P. japonicum* roots. Confocal images of transgenic hairy roots carrying *pDR5rev:3xVenus-N7*. (A) at root apical meristem. (B) mature zone. Bars correspond to 50  $\mu$ m.

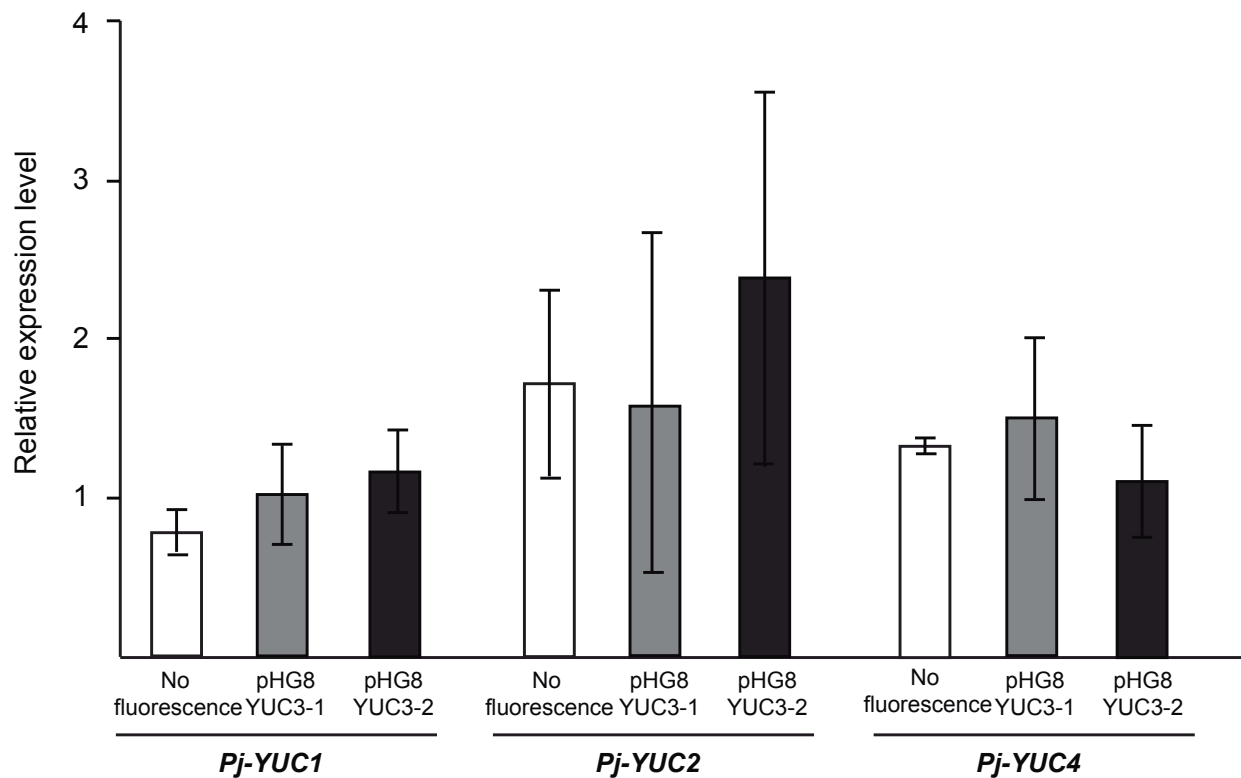

Supplemental Figure 11. Transcript levels of *YUC* homologs in transgenic roots. Transcript levels were measured by RT-qPCR in transgenic roots transformed with non-fluorescent hairy roots, pHG8-YUC3-1 and pHG8YUC3-2 after 48 h in contact with host *Arabidopsis* roots using primer pairs specific for the *Pj-YUC1*, *Pj-YUC2* and *Pj-YUC4* genes. Data correspond to the average  $\pm$  standard error of three to five biological replicates with 5-15 independent transgenic roots per experiment.



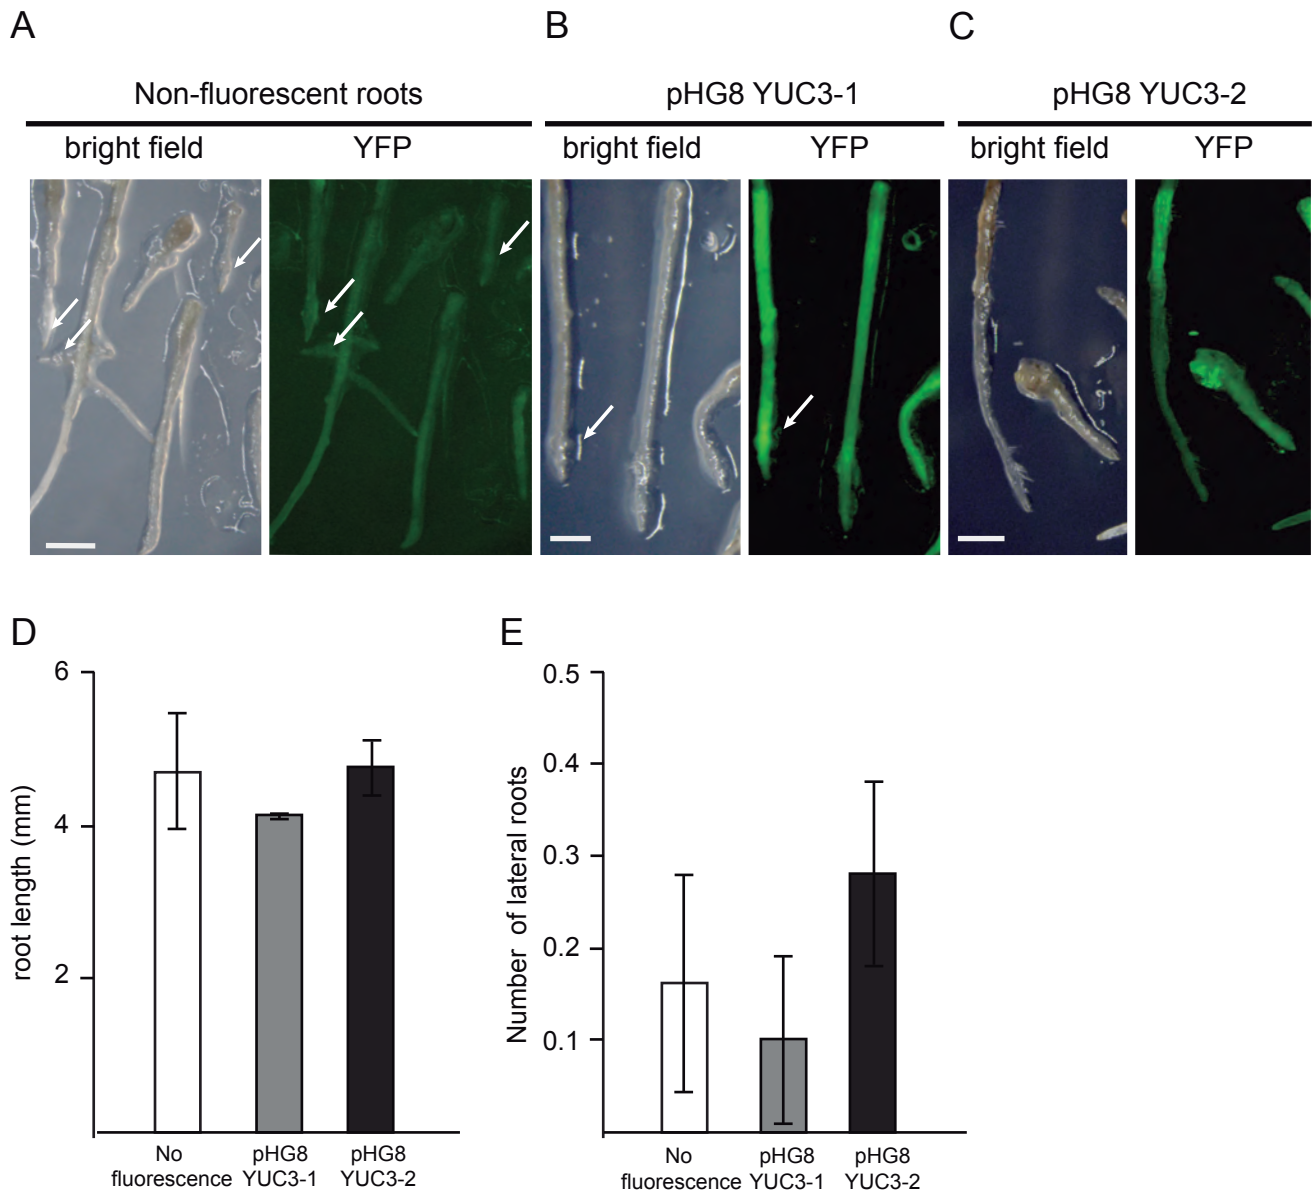

Supplemental Figure 12. Morphology of transformed hairy roots. (A - C) Photographs of transgenic roots transformed with the control (A) or silencing constructs (B, C) after 48 h of DMBQ treatment, under bright field (left) and fluorescence (right). Arrows point to haustoria. Bars correspond to 1 cm. (D) Root length of transgenic roots. (E) Number of lateral roots per transgenic root. Data correspond to the average  $\pm$  standard error of three to five biological replicates with 5-15 independent transgenic roots per experiment.

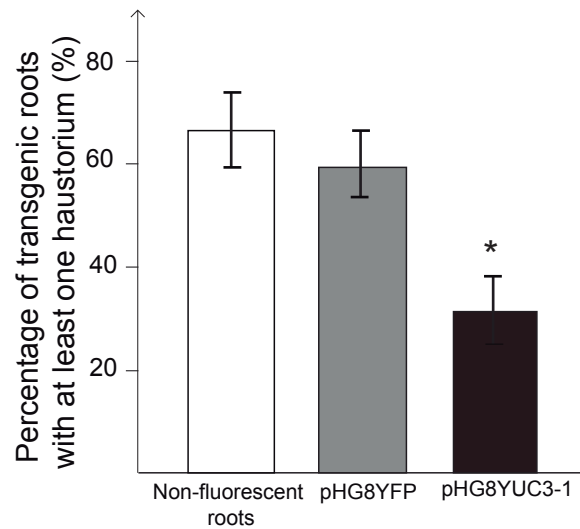

Supplemental Figure 13. RNAi lines of *P. japonicum* roots targeted to *YUC3* show reduced haustorium formation induced by rice root exudates. Graph shows the percentage of transgenic roots with at least one haustorium. Roots transformed with empty vector pHG8-YFP and no-fluorescent hairy roots were used as control. Non-fluorescent roots represent those transgenic hairy roots without the T-DNA containing the fluorescent protein gene. Root silenced for Pj-*YUC3* gene carries the construct pHG8YUC3-1. Asterisk (\*) represent  $\alpha = 0.01$  by t-Test assuming unequal variances. Values represent average  $\pm$  SD of three to six independent experiments with 10 to 40 transformed roots per experiment. Total n = 99, 90 and 89 in no fluorescent roots, pHG8-YFP and pHG8YUC3-1, respectively.

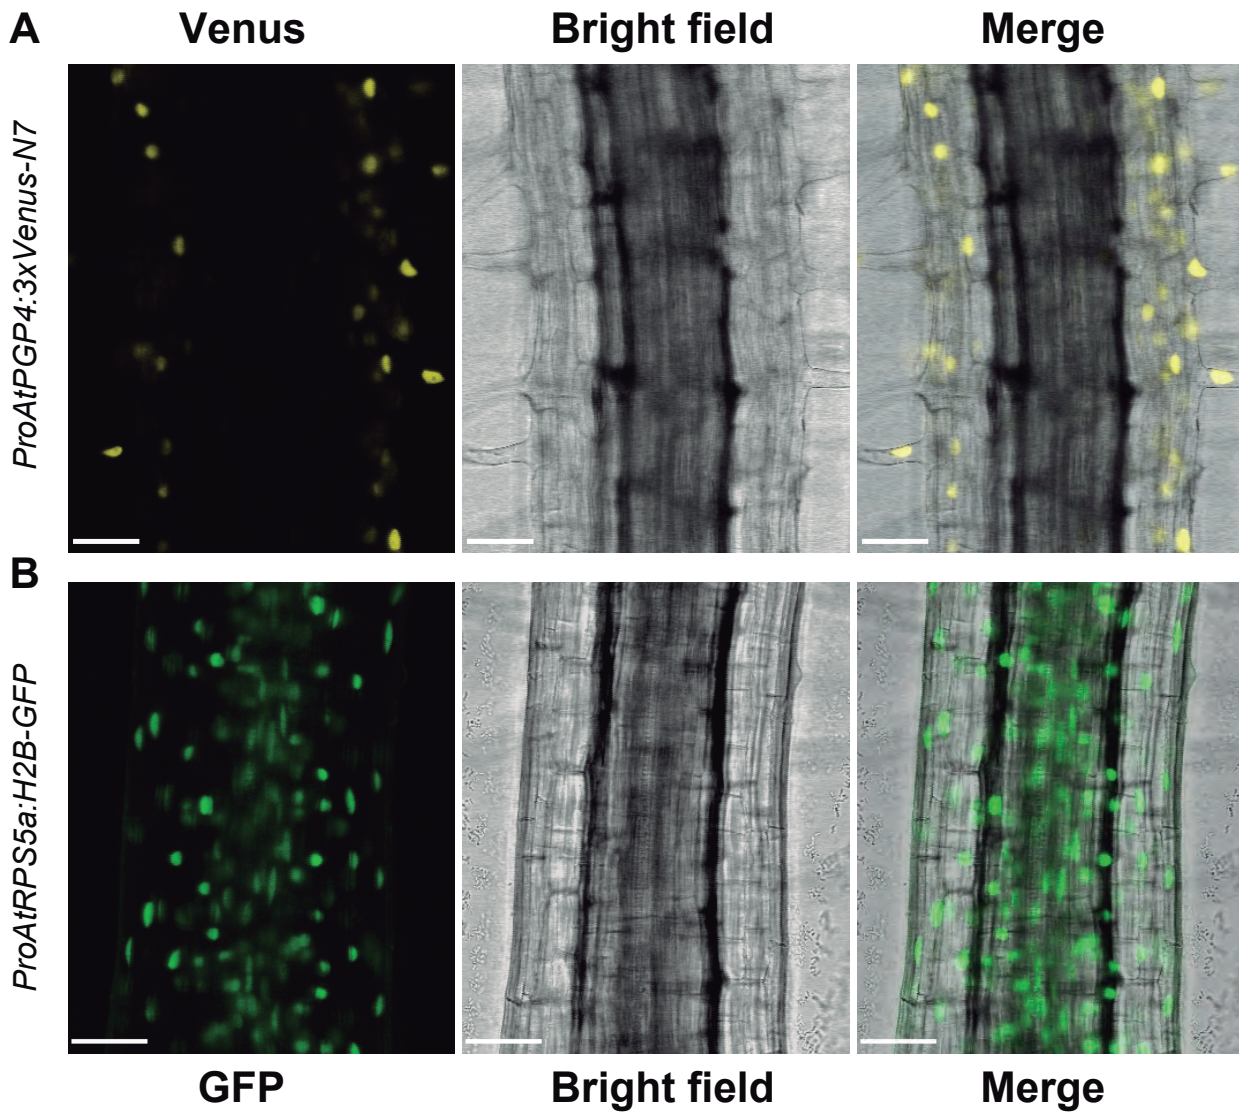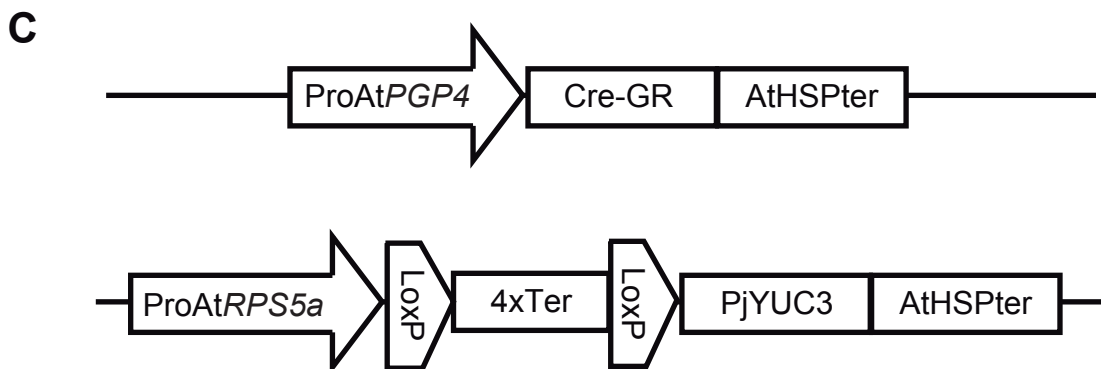

Supplemental Figure 14. Expression patterns of *At-PGP4* promoter and *At-RPS5a* promoter in *P. japonicum*. (A) *At-PGP4* promoter expression in *P. japonicum* root transformed with *AtPGP4:3xVenus-N7*. (B) *At-RPS5a* promoter expression in *P. japonicum* root transformed with *AtRPS5a:H2B-GFP*. Bars correspond to 50  $\mu$ m. (C) Schematic view of *AtPGP4>>PjYUC3* construct.

**Supplemental Table 1** - Total number of reads obtained in each RNA-seq library

|                  | <b>Sequencer</b>    | <b>Material</b>   | <b>Read</b>                         | <b>Total sequence</b> |
|------------------|---------------------|-------------------|-------------------------------------|-----------------------|
| <b>Library 1</b> | Illumina Hi-seq2000 | Autotrophic Stage | 24,537,964 reads<br>(90 bp reads)   | 2,208,416,760 bp      |
| <b>Library 2</b> | Illumina Hi-seq2000 | Haustoria         | 25,841,404 reads<br>(90 bp reads)   | 2,325,726,360 bp      |
| <b>Library 3</b> | Roche 454 FLX       | Mixed             | 888,638 reads<br>(average 333.8 bp) | 296,626,260 bp        |

**Supplemental Table 2.** Investigation on the rice contamination in *P. japonicum* unigenes

| <b>e-value threshold</b> | <b>Number of contigs matched with rice sequences*</b> | <b>Minimum alignment length</b> |
|--------------------------|-------------------------------------------------------|---------------------------------|
| 1e-10                    | 238                                                   | 37 bp                           |
| 1e-20                    | 198                                                   | 54 bp                           |
| 1e-30                    | 176                                                   | 73 bp                           |
| 1e-40                    | 160                                                   | 92 bp                           |

\*Number of *P. japonicum* unigenes that show local alignment in the indicated e-value and 100% identity with rice cDNAs (ver 6.1)



**Supplemental Table 3: Summary of *de novo* assembly of *P. japonicum* transcriptome**

|                                                     | <b>Values</b>                         |
|-----------------------------------------------------|---------------------------------------|
| <b>Number of contigs</b>                            | 57,939                                |
| <b>Total residues (bp)</b>                          | 47,011,167                            |
| <b>Minimum length (bp)</b>                          | 300                                   |
| <b>Maximum length (bp)</b>                          | 12,710                                |
| <b>Average length (bp)</b>                          | 812                                   |
| <b>N50 length (bp)</b>                              | 1,090                                 |
| <b>Putative protein coding<sup>a</sup></b>          | 47,817 (82.5%)                        |
| <b>Putative proteins with start codon</b>           | 17,044 (35.6 % of predicted proteins) |
| <b>Blast hits to <i>Arabidopsis</i><sup>b</sup></b> | 34,897 (60.23%)                       |
| <b>Blast hits RefSeq-prot<sup>b</sup></b>           | 38,372 (66.23%)                       |
| <b>Blast hits to nr<sup>b</sup></b>                 | 37,259 (64,3%)                        |

<sup>a</sup> Number of ESTScan-predicted protein sequences more than 50 aa

<sup>b</sup> Blastx with threshold e-value less than 1e-10.
